# Supplementary material for: Anthropogenic Infection of Domestic Cats With SARS-CoV-2 Alpha Variant B.1.1.7 Lineage in Buenos Aires
Source: PubMed Central journal article supplement (PMC8925007; doi:10.3389/fvets.2022.790058), 2022-03-01
Supplement: Data_Sheet_1.pdf [file Data_Sheet_1.pdf]

## *Supplementary Material*

### 1.1 Supplementary Figures

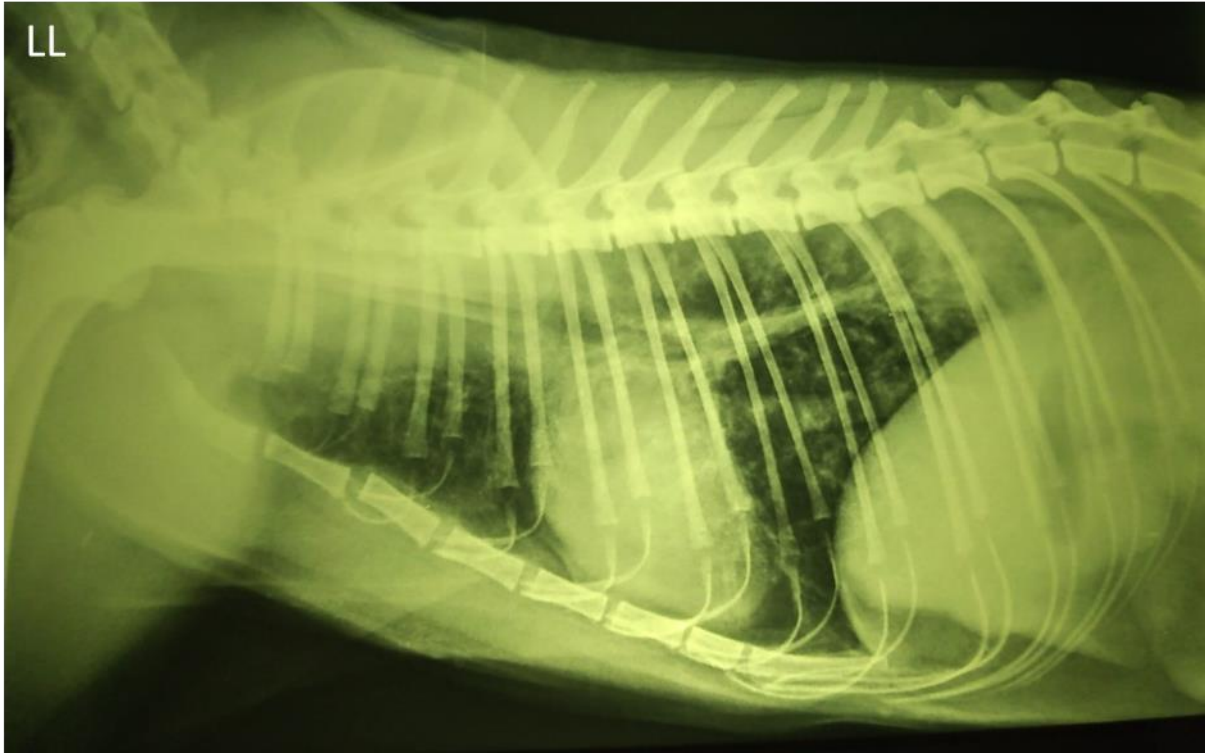

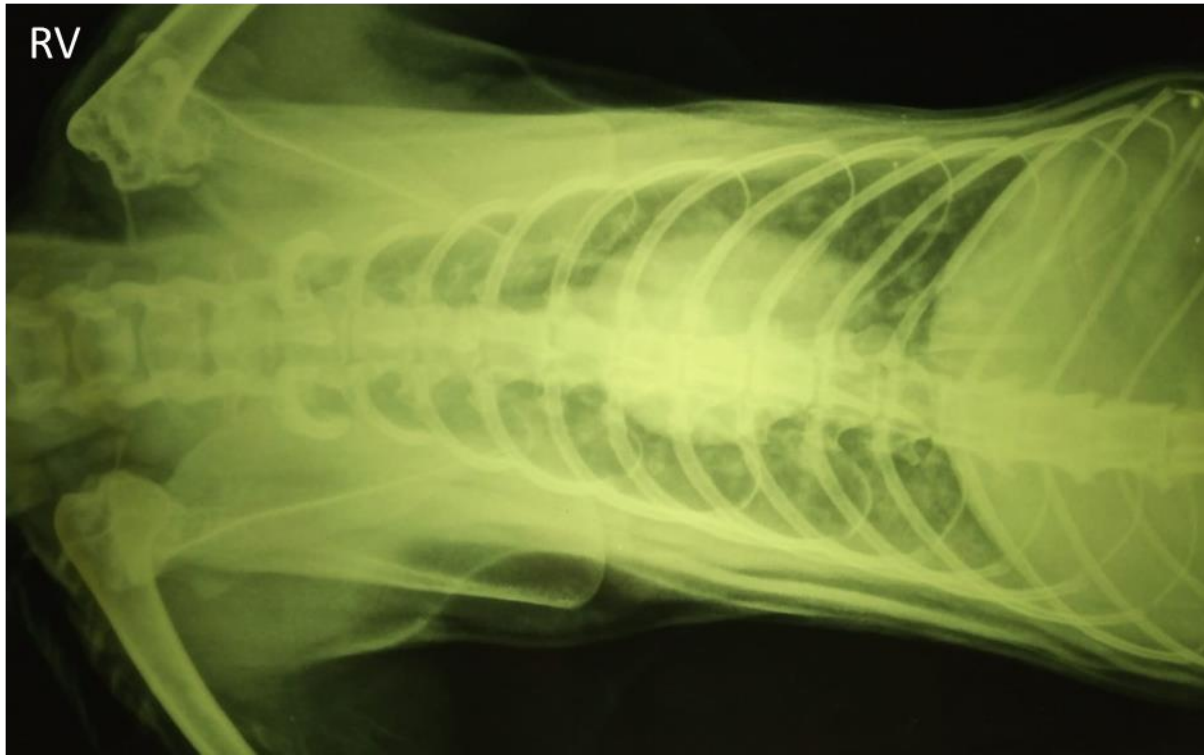

**Supplementary Figure 1.** Latero-Lateral (LL) and Ventrodorsal (RV) radiographic views of Cat N°3.
